# Supplementary material for: Targeting synovial fibroblast proliferation in rheumatoid arthritis (TRAFIC): an open-label, dose-finding, phase 1b trial
Source: PubMed Central journal article supplement (PMC8062952; doi:10.1016/s2665-9913(21)00061-8), 2021-03-09
Supplement: mmc1.pdf [file mmc1.pdf]

# THE LANCET

## Rheumatology

### Supplementary appendix

This appendix formed part of the original submission and has been peer reviewed.  
We post it as supplied by the authors.

Supplement to: Pratt A G, Siebert S, Cole M, et al. Targeting synovial fibroblast proliferation in rheumatoid arthritis (TRAFIC): an open-label, dose-finding, phase 1b trial. *Lancet Rheumatol* 2021; published online March 9. [https://doi.org/10.1016/S2665-9913\(21\)00061-8](https://doi.org/10.1016/S2665-9913(21)00061-8).

# **Targeting synovial fibroblast proliferation in rheumatoid arthritis: a phase 1b trial.**

Pratt AG *et al.*

## **Supplementary File.**

### **Research in Context Search Terms and Strategy.**

Two search terms were employed to underpin the content of the Research in Context section, as below. In each case, results were reviewed manually to identify relevant items.

#### **1. Trials targeting the synovial fibroblast in Rheumatoid Arthritis.**

("Fibroblast" OR (((("cyclin dependent kinase" OR "CDK") AND "inhibitor") OR "CDKI")) AND "Rheumatoid Arthritis" AND "trial").

Three relevant interventional clinical trials were identified, included in the manuscript as references 20, 21 and 22.

#### **2. Adaptive designs in rheumatoid arthritis clinical trials.**

("Rheumatoid arthritis" OR "RA") AND ("adaptive design" OR "adaptive trial design" OR "Bayesian adaptive" OR ("continuous reassessment method" OR "CRM")).

Three relevant original articles describing clinical trials in rheumatoid arthritis that adopted adaptive designs were identified, included in the manuscript as references 27 and 28; neither of these specifically employed the continuous reassessment method (CRM) used in our investigation.

## Supplementary Tables.

**Table S1**

|                                                                                                                                                                                                                                                                               |
|-------------------------------------------------------------------------------------------------------------------------------------------------------------------------------------------------------------------------------------------------------------------------------|
| <b>Inclusion criteria (participants must fulfil all of the following):</b>                                                                                                                                                                                                    |
| Rheumatoid arthritis fulfilling the 1987 ACR or 2010 ACR/EULAR criteria                                                                                                                                                                                                       |
| Age $\geq$ 18 years                                                                                                                                                                                                                                                           |
| At least 6 months' disease duration                                                                                                                                                                                                                                           |
| ACR Functional Class I-III                                                                                                                                                                                                                                                    |
| DAS28 $\geq$ 3.2                                                                                                                                                                                                                                                              |
| Currently taking anti-TNF as part of standard clinical care, and have received stable treatment with a single anti-TNF agent for at least 3 months upon entry to the study.                                                                                                   |
| Anti-TNF may be administered as either monotherapy or with background conventional DMARDs. Permitted background DMARDs are methotrexate, sulphasalazine and hydroxychloroquine, either alone or in combination, at stable dose(s) for $\geq$ 4 weeks prior to baseline visit. |
| No intramuscular glucocorticoid administration in the 4 week period prior to baseline visit. Stable dose of non-steroidal anti-inflammatory drug (NSAID) or corticosteroid (prednisolone $\leq$ 7.5 mg) for $\geq$ 4 weeks as part of standard clinical care are allowed.     |
| <b>Exclusion criteria (participants must not have any of the following):</b>                                                                                                                                                                                                  |
| If patients were previously taking leflunomide a minimum period of 20 days must have elapsed between the last dose of leflunomide and the first dose of IMP.                                                                                                                  |
| Use of other investigational medicinal products within 30 days prior to trial entry (defined as date of recruitment into trial).                                                                                                                                              |
| Serious or unstable co-morbidity deemed unsuitable by principal investigator e.g. COPD, cardiac failure, other significant autoimmune disease                                                                                                                                 |
| Patients must not drink more than 2 units of alcohol per day and no more than 10 units of alcohol per week during the trial and for a 4 week period after completion of the trial.                                                                                            |
| Known active infection at screening visit or at baseline (except fungal nail infection)                                                                                                                                                                                       |
| Infection requiring hospitalization or IV antibiotics within 6 weeks prior to baseline                                                                                                                                                                                        |
| History of recurrent or chronic infection                                                                                                                                                                                                                                     |
| Recent live vaccination (within 6 weeks of baseline)                                                                                                                                                                                                                          |
| Haemoglobin $<$ 10g/dL; neutrophils $<$ 1.5 $\times 10^9$ /L; platelets $<$ 100 $\times 10^9$ /L                                                                                                                                                                              |
| Patients taking ketoconazole, voriconazole, erythromycin, clarithromycin.                                                                                                                                                                                                     |
| ALT or ALP $>$ 1.5x upper limit of normal                                                                                                                                                                                                                                     |
| Estimated glomerular filtration rate $<$ 60ml/minute                                                                                                                                                                                                                          |
| Major surgery within 8 weeks prior to baseline or planned within 3 months from baseline.                                                                                                                                                                                      |
| Pregnancy, or women planning to become pregnant within the trial period, or women who are breast feeding                                                                                                                                                                      |
| Females or males of child-bearing potential unwilling to use two forms of adequate contraception whilst taking the IMP and for one month afterwards.                                                                                                                          |

**Supplementary Table S1.** Full list of inclusion criteria for part 1 of TRAFIC study.

**Table S2**

| Subject  | Cohort | Seliciclib dose (mg) | Adverse Event        | Relationship to treatment <sup>A</sup> | Severity <sup>B</sup> | Contribution to DLT | Resolved at end of trial |
|----------|--------|----------------------|----------------------|----------------------------------------|-----------------------|---------------------|--------------------------|
| <u>1</u> | 1      | 400                  | Nausea               | Probably                               | Moderate              | No                  | Yes                      |
|          |        |                      | Fatigue              | Probably                               | Moderate              | No                  | Yes                      |
|          |        |                      | Heartburn            | Probably                               | Mild                  | No                  | Yes                      |
|          |        |                      | Anorexia             | Probably                               | Mild                  | No                  | Yes                      |
|          |        |                      | Nausea               | Probably                               | Severe                | <b>Yes</b>          | Yes                      |
|          |        |                      | Fatigue              | Probably                               | Severe                | <b>Yes</b>          | Yes                      |
|          |        |                      | AST increased        | Probably                               | Moderate              | <b>Yes</b>          | Yes                      |
|          |        |                      | ALT increased        | Probably                               | Mild                  | No                  | Yes                      |
|          |        |                      | Blood ALP increased  | Probably                               | Mild                  | No                  | Yes                      |
| 2        | 1      | 400                  | Nausea               | Definitely                             | Moderate              | No                  | Yes                      |
|          |        |                      | Nausea               | Definitely                             | Moderate              | No                  | Yes                      |
|          |        |                      | Shingles on forehead | Unrelated                              | Moderate              | No                  | Ongoing                  |
| 3        | 1      | 400                  | Sleepiness           | Probably                               | Moderate              | No                  | Yes                      |
|          |        |                      | Sleepiness           | Probably                               | Mild                  | No                  | Yes                      |
|          |        |                      | Sleepiness           | Probably                               | Mild                  | No                  | Yes                      |
|          |        |                      | Nausea               | Possibly                               | Mild                  | No                  | Yes                      |
|          |        |                      | Flatulence           | Possibly                               | Mild                  | No                  | Yes                      |
| <u>4</u> | 2      | 600                  | Nausea               | Definitely                             | Severe                | <b>Yes</b>          | Yes                      |
|          |        |                      | Dizziness            | Definitely                             | Severe                | <b>Yes</b>          | Yes                      |
|          |        |                      | Diarrhoea            | Definitely                             | Severe                | <b>Yes</b>          | Yes                      |
| 5        | 2      | 600                  | Nausea               | Possibly                               | Mild                  | No                  | Yes                      |
|          |        |                      | Nausea               | Possibly                               | Mild                  | No                  | Yes                      |
|          |        |                      | Nausea               | Possibly                               | Mild                  | No                  | Yes                      |
|          |        |                      | Stomach pain         | Probably                               | Mild                  | No                  | Yes                      |

|                       |   |     |                                                                   |           |        |            |         |
|-----------------------|---|-----|-------------------------------------------------------------------|-----------|--------|------------|---------|
|                       |   |     | Runny nose                                                        | Possibly  | Mild   | No         | Yes     |
|                       |   |     | Flaking finger nails                                              | Unrelated | Mild   | No         | Ongoing |
|                       |   |     | Stomach pain                                                      | Probably  | Mild   | No         | Yes     |
| <u>6</u> <sup>c</sup> | 2 | 600 | Immunoglobulin monoclonal gammopathy of undetermined significance | Unrelated | Mild   | No         | Ongoing |
| 7                     | 3 | 400 | Dermatitis on both hands                                          | Unlikely  | Mild   | No         | Yes     |
|                       |   |     | Low mood                                                          | Unlikely  | Mild   | No         | Yes     |
| 8                     | 3 | 400 | Nausea                                                            | Probably  | Mild   | No         | Yes     |
|                       |   |     | Indigestion                                                       | Possibly  | Mild   | No         | Yes     |
| <u>9</u> <sup>c</sup> | 3 | 400 | Nausea                                                            | Probably  | Mild   | No         | Yes     |
|                       |   |     | Diarrhoea                                                         | Probably  | Mild   | No         | Yes     |
|                       |   |     | Nausea                                                            | Probably  | Severe | <b>Yes</b> | Yes     |
|                       |   |     | Diarrhoea                                                         | Probably  | Severe | <b>Yes</b> | Yes     |
|                       |   |     | Abdominal pain                                                    | Probably  | Severe | <b>Yes</b> | Yes     |
| 10                    | 4 | 400 | Leukocytes in urine                                               | Unlikely  | Mild   | No         | Yes     |
|                       |   |     | Leukocytes in Urine                                               | Unlikely  | Mild   | No         | Ongoing |
|                       |   |     | Coryzal symptoms                                                  | Unlikely  | Mild   | No         | Yes     |
|                       |   |     | Right side of neck - enlarged lymph nodes                         | Unlikely  | Mild   | No         | Yes     |
|                       |   |     | Urinary tract infection - E Coli                                  | Unlikely  | Mild   | No         | Yes     |
|                       |   |     | Chest Infection - Sputum culture Moraxella Catarrhalis            | Unlikely  | Mild   | No         | Yes     |
| 11                    | 4 | 400 | Nausea                                                            | Possibly  | Mild   | No         | Yes     |
|                       |   |     | ALT increased                                                     | Possibly  | Mild   | No         | Yes     |
|                       |   |     | URTI (viral)                                                      | Possibly  | Mild   | No         | Ongoing |
|                       |   |     | LRTI (viral)                                                      | Possibly  | Mild   | No         | Ongoing |
|                       |   |     | Cough                                                             | Unrelated | Mild   | No         | Ongoing |
| <u>12</u>             | 4 | 400 | ALT increased                                                     | Probably  | Mild   | <b>Yes</b> | Yes     |
|                       |   |     | AST increased                                                     | Probably  | Mild   | <b>Yes</b> | Yes     |
|                       |   |     | Dizziness                                                         | Probably  | Mild   | <b>Yes</b> | Yes     |

|                    |            |      |                                      |            |          |            |         |
|--------------------|------------|------|--------------------------------------|------------|----------|------------|---------|
|                    |            |      | Fever                                | Probably   | Mild     | <b>Yes</b> | Yes     |
| 13                 | 5          | 400  | Headache                             | Unlikely   | Mild     | No         | Yes     |
| 14                 | 5          | 400  | ALT increased                        | Possibly   | Moderate | No         | Yes     |
|                    |            |      | Right knee soft tissue injury        | Unrelated  | Moderate | No         | Ongoing |
|                    |            |      | Transient ear ache                   | Unlikely   | Mild     | No         | Yes     |
| <u>15</u>          | 5          | 400  | Nausea                               | Definitely | Mild     | <b>Yes</b> | Yes     |
|                    |            |      | Vomiting                             | Definitely | Moderate | <b>Yes</b> | Yes     |
|                    |            |      | ALT increased                        | Definitely | Severe   | <b>Yes</b> | Yes     |
|                    |            |      | AST increased                        | Definitely | Mild     | <b>Yes</b> | Ongoing |
|                    |            |      | Blood alkaline phosphatase increased | Definitely | Mild     | <b>Yes</b> | Yes     |
|                    |            |      | Dizziness                            | Possibly   | Mild     | <b>Yes</b> | Yes     |
|                    |            |      | Jaundice                             | Definitely | Severe   | No         | Yes     |
|                    |            |      | ALT increased                        | Definitely | Moderate | No         | Yes     |
| Bilirubin increase | Definitely | Mild | <b>Yes</b>                           | Yes        |          |            |         |

**Supplementary Table S2.** Line listing of all non-serious adverse events. ALP: alkaline phosphatase; AST: aspartate aminotransferase; ALT: alanine transaminase; DLT: Dose-limiting toxicity; U/LRTI: upper/lower respiratory tract infection <sup>A</sup>Causality classified by supervising investigator, with terms 'definitely,' 'probably' or 'possibly' being required to define a treatment related AE, as summarised in Table 2 of main manuscript; <sup>B</sup>severity criteria classified as described in Reference 3. <sup>C</sup>Patients 6 and 9 both experienced SAEs. Identifiers underlined for subjects who experienced a DLT.

**Table S3**

| Patient ID           | Cohort number | Protocol Dose (mg) | Percentage of protocol dose received |           | Seliciclib AUC <sub>0-6hr</sub> (ng/ml.hr) |              | Seliciclib C <sub>max</sub> (ng/ml) |              | Number of related (possibly, probably, definitely) AEs <sup>A</sup> | Number of related (possibly, probably, definitely) SAEs |
|----------------------|---------------|--------------------|--------------------------------------|-----------|--------------------------------------------|--------------|-------------------------------------|--------------|---------------------------------------------------------------------|---------------------------------------------------------|
|                      |               |                    | Week 1                               | Week 4    | Day 1 Week 1                               | Day 1 Week 4 | Day 1 Week 1                        | Day 1 Week 4 |                                                                     |                                                         |
| <u>1</u>             | 1             | 400                | 100                                  | NA        | 5875                                       | NA           | 1570                                | NA           | 9                                                                   | 0                                                       |
| <u>2</u>             | 1             | 400                | 100                                  | 100       | 717                                        | 597          | 443                                 | 188          | 2                                                                   | 0                                                       |
| <u>3</u>             | 1             | 400                | 100                                  | 100       | 483                                        | 363          | 165                                 | 110          | 5                                                                   | 0                                                       |
| <u>4</u>             | 2             | 600                | 100                                  | NA        | 5753                                       | NA           | 1560                                | NA           | 3                                                                   | 0                                                       |
| <u>5</u>             | 2             | 600                | 100                                  | 100       | 7217                                       | 1182         | 2640                                | 461          | 6                                                                   | 0                                                       |
| <u>6<sup>B</sup></u> | <u>2</u>      | <u>600</u>         | <u>25</u>                            | <u>NA</u> | <u>3605</u>                                | <u>NA</u>    | <u>937</u>                          | <u>NA</u>    | <u>0</u>                                                            | <u>1</u>                                                |
| <u>7</u>             | 3             | 400                | 100                                  | 125       | 2090                                       | 1688         | 775                                 | 670          | 0                                                                   | 0                                                       |
| <u>8</u>             | 3             | 400                | 125                                  | 100       | 5127                                       | 5498         | 1070                                | 1700         | 2                                                                   | 0                                                       |
| <u>9<sup>B</sup></u> | <u>3</u>      | <u>400</u>         | <u>100</u>                           | <u>NA</u> | <u>1757</u>                                | <u>NA</u>    | <u>678</u>                          | <u>NA</u>    | <u>5</u>                                                            | <u>1</u>                                                |
| <u>10</u>            | 4             | 400                | 100                                  | 100       | 2619                                       | 2190         | 632                                 | 625          | 0                                                                   | 0                                                       |
| <u>11</u>            | 4             | 400                | 100                                  | 100       | 2179                                       | 1409         | 720                                 | 534          | 4                                                                   | 0                                                       |
| <u>12</u>            | 4             | 400                | 100                                  | NA        | 5362                                       | NA           | 1680                                | NA           | 4                                                                   | 0                                                       |
| <u>13</u>            | 5             | 400                | 100                                  | 100       | 1919                                       | 1807         | 478                                 | 539          | 0                                                                   | 0                                                       |
| <u>14</u>            | 5             | 400                | 125                                  | 100       | 1045                                       | 1320         | 257                                 | 311          | 1                                                                   | 0                                                       |
| <u>15</u>            | 5             | 400                | 100                                  | NA        | 1373                                       | NA           | 319                                 | NA           | 9                                                                   | 0                                                       |

**Supplementary Table S3.** Seliciclib dosing, seliciclib pharmacokinetic parameters and related adverse events by patient. <sup>A</sup>There were 50 related (possibly, probably, definitely) AEs in total of which 31 were mild, 9 moderate and 10 severe. <sup>B</sup>Patients 6 and 9 both experienced SAEs. Identifiers underlined for subjects who experienced a DLT.

Supplementary Figures.

Figure S1.

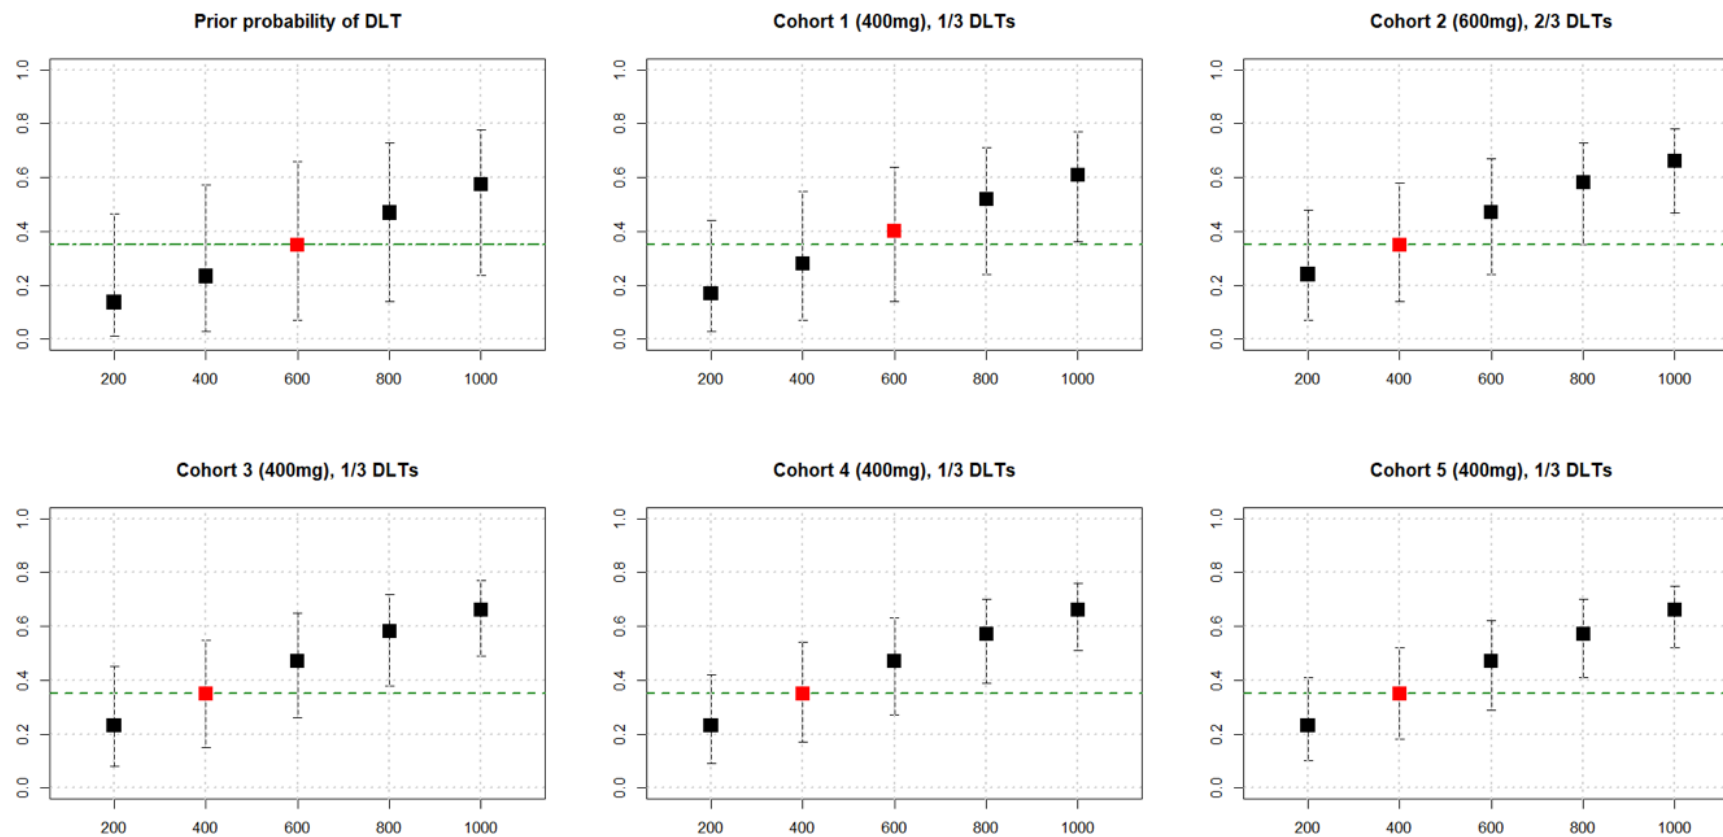

**Figure S1.** The prior probability of dose limiting toxicity (DLT; y axis) at each dose level (x axis) is depicted in the top left panel; error bars indicate probability intervals. In remaining panels, Bayesian posterior probabilities of DLT after completion of the indicated cohort (with its dosing level and DLT rate) are depicted. Estimated maximum tolerated dose (MTD) is indicated in red at each stage, and does not change after completion of cohort 2, but the probability intervals can be seen to narrow as the trial progresses.



Figure S2.

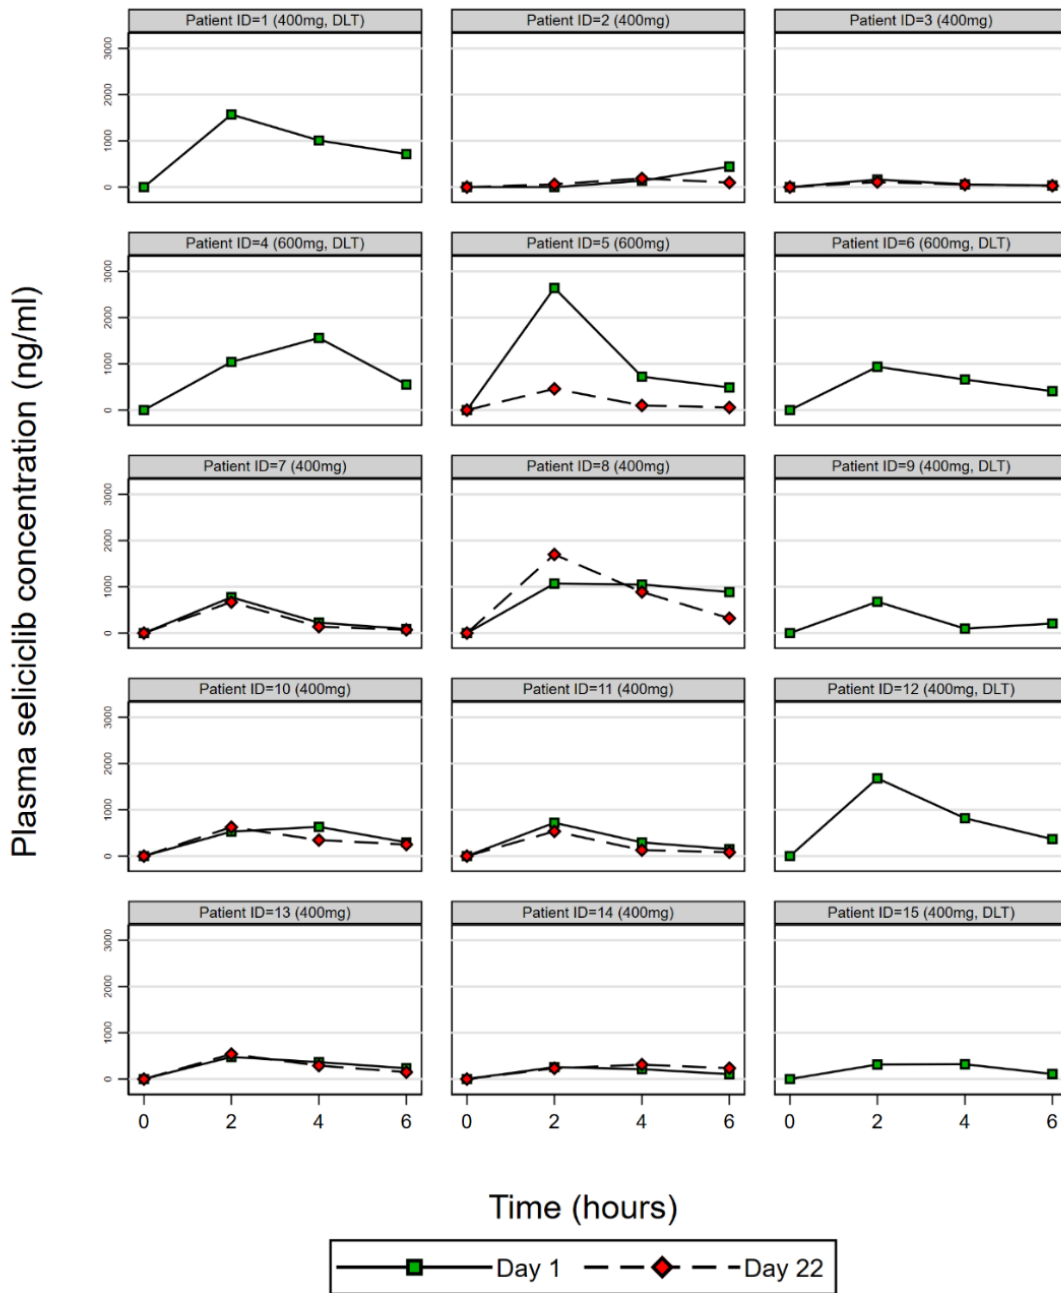

Figure S2. Plasma seliciclib concentrations 0, 2, 4 and 6 hours after dosing on days 1 (green; unbroken line) and 22 (red; broken line, unavailable for patients who experienced DLTs). Headers show prescribed daily dose and indicate if DLT occurred. Cohorts 1-5 are depicted by row (uppermost = cohort 1).

Figure S3

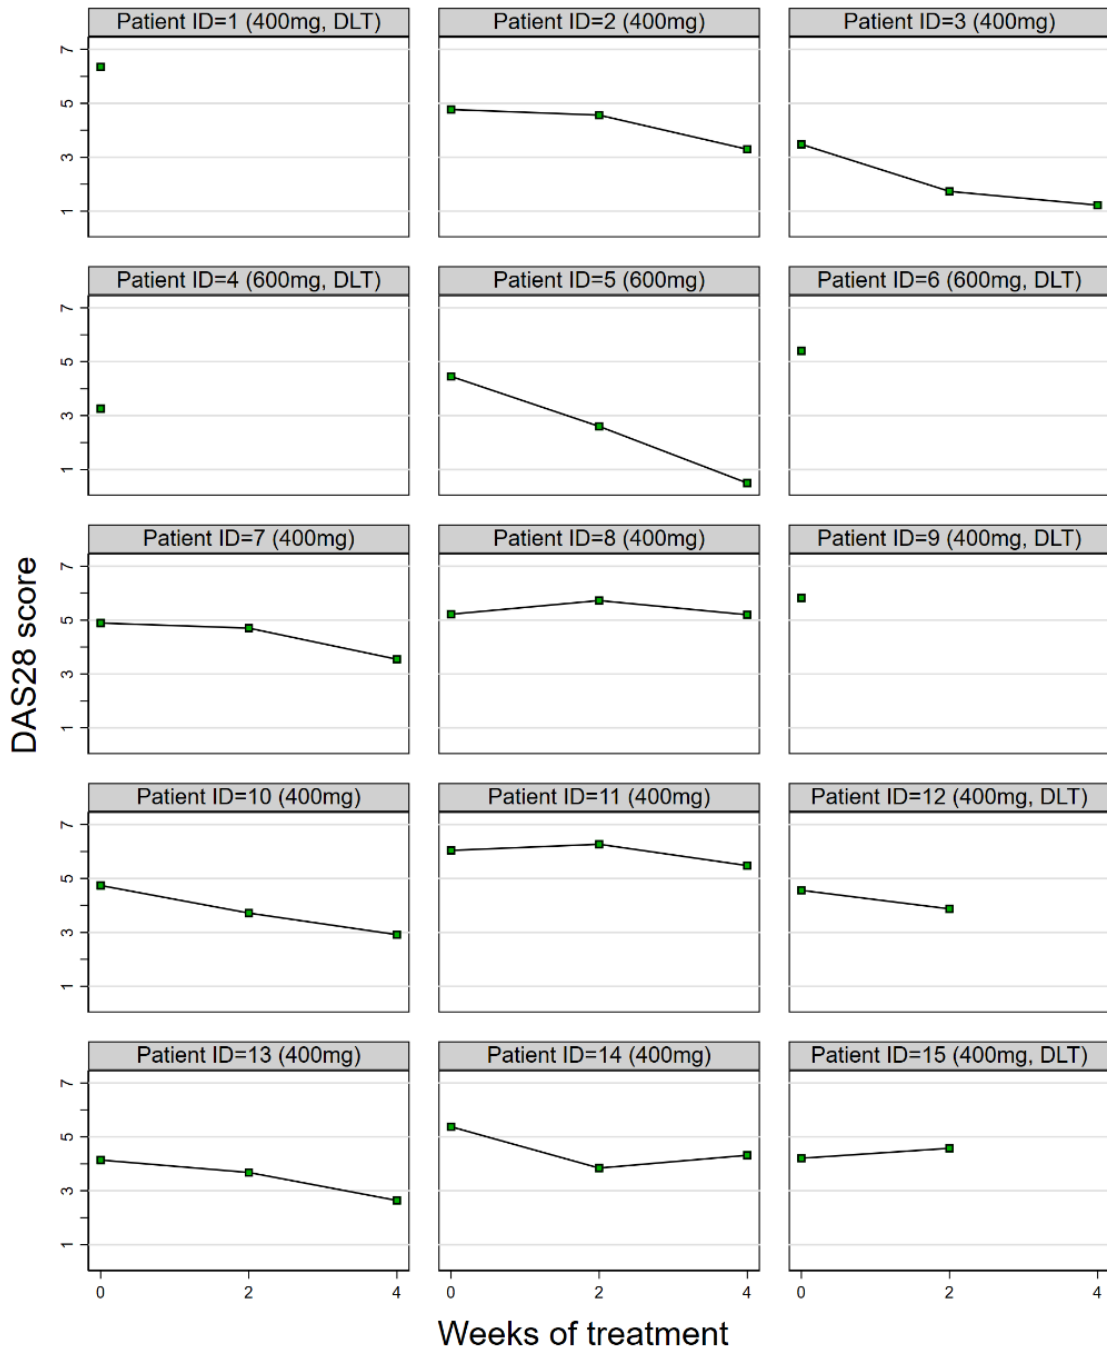

*Supplementary Figure S3. DAS28-CRP scores obtained prior to seliciclib treatment and at indicated time points following treatment initiation for all trial participants where data available. Headers show prescribed daily dose and indicate if DLT occurred. Cohorts 1-5 are depicted by row (uppermost = cohort 1).*

**Figure S4**

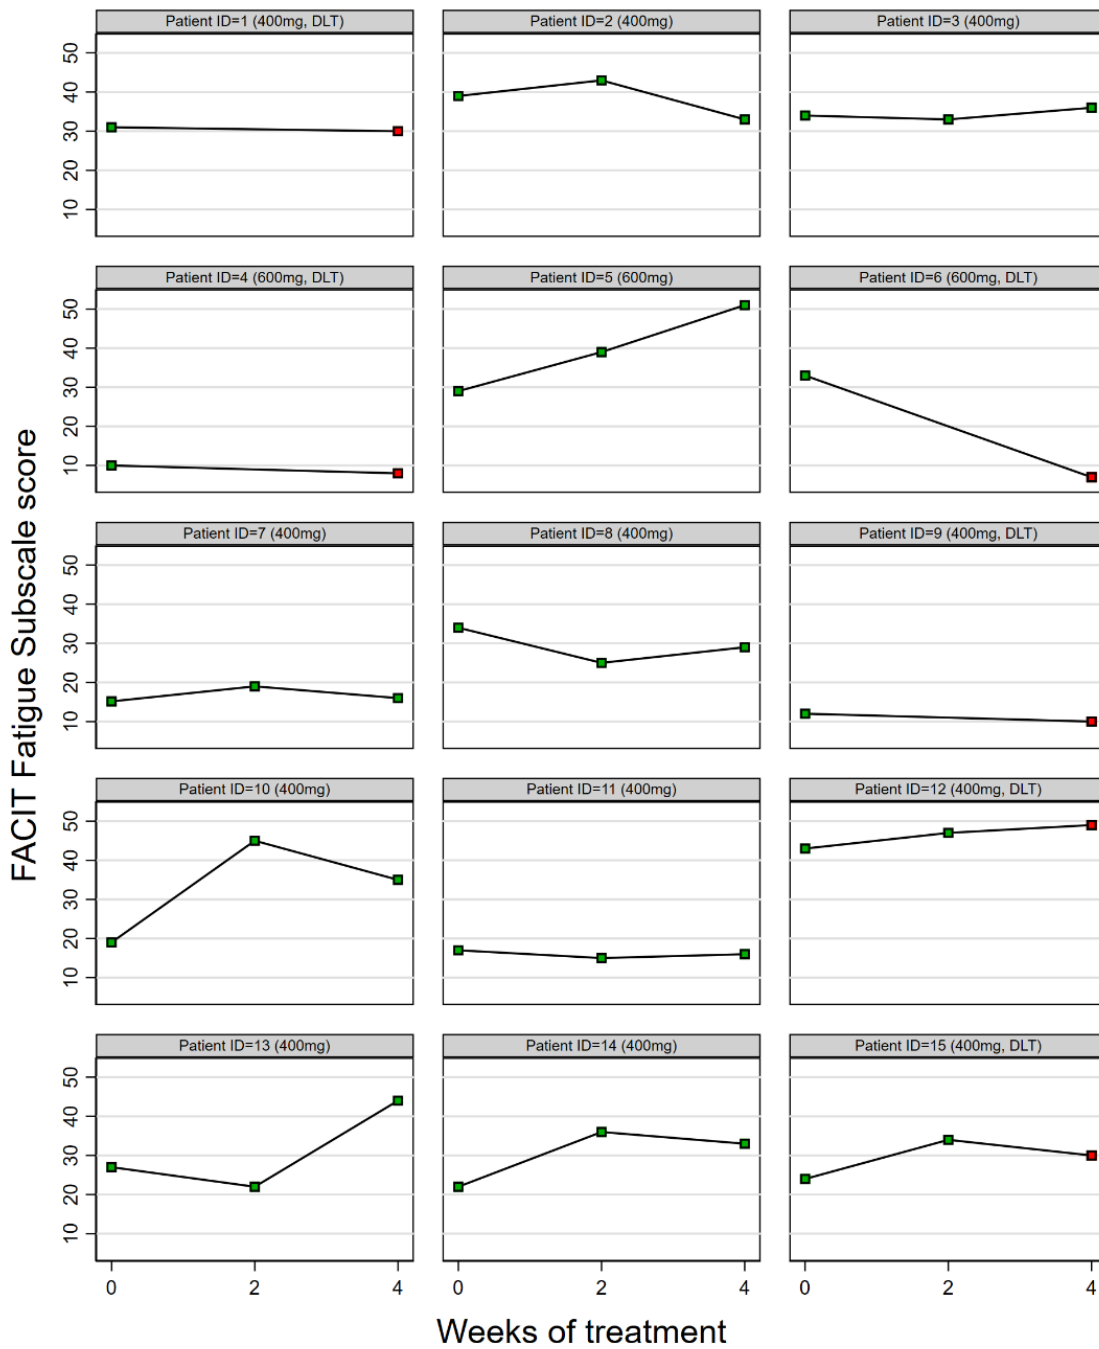

**Supplementary Figure S4.** FACIT Fatigue subscale score by patient at the indicated time points following treatment initiation where data available; Higher scores indicate lower reported fatigue. Data points at 4 weeks are depicted in either green (measured after 4 weeks' completed therapy) or red (measured at visit following treatment cessation after DLT). Headers show prescribed daily dose and indicate if DLT occurred. Cohorts 1-5 are depicted by row (uppermost = cohort 1).
